# Supplementary material for: Switchable dielectrophoresis of defect-free droplets in an anisotropic liquid crystal medium
Source: Royal Society of Chemistry journal article supplement (doi:10.1039/c9sm00608g), 2019-01-01
Supplement: c9sm00608g1.pdf [file c9sm00608g1.pdf]

## Supplementary Information

### This file includes:

**Fig. S1** Simulation procedure for SDEP force and potential energy.

**Fig. S2** Absolute value of real dielectric anisotropy ( $|\delta\epsilon|$ ) of LC as a function of frequency at 20 °C and 79 °C, and  $|\delta\epsilon|$  as a function of temperature at 1 kHz near  $T_{NI}$ .

### Other Supplementary information for this manuscript includes the following:

**Movie S1.** Bidirectional DEP of an isotropic droplet under the application of 60 Hz square wave signals.

**Movie S2.** Bidirectional DEP of an isotropic droplet under the application of 1 kHz square wave signals.

**Movie S3.** Bidirectional DEP of an isotropic pocket under the application of 60 Hz square wave signals.

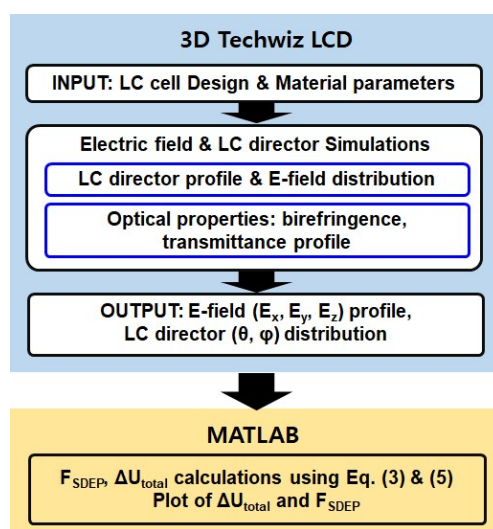

**Fig. S1** Simulation procedure for SDEP force and potential energy.

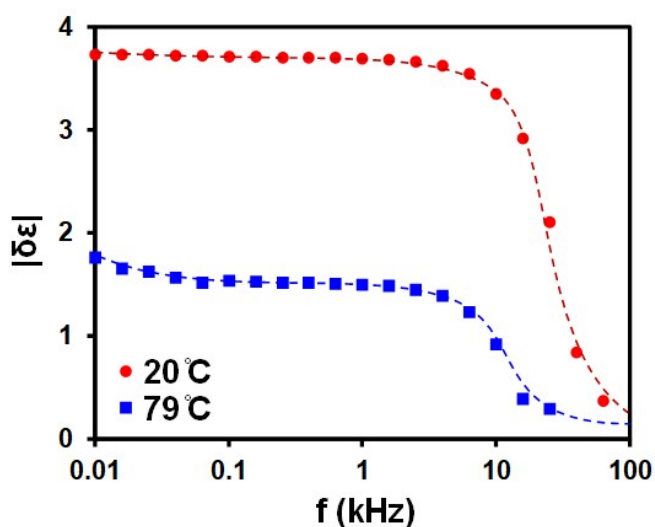

**Fig. S2** Absolute value of real dielectric anisotropy ( $|\delta\epsilon|$ ) of LC as a function of frequency at 20 °C and 79 °C.
